# Supplementary material for: Evidence for the formation of a metal alkyl intermediate in the zinc mediated intramolecular hydroamination
Source: Royal Society of Chemistry journal article supplement (doi:10.1039/c3cc45491f), 2013-01-01

**Supporting Information**  
**for**  
**Evidence for the Formation of a Metal Alkyl Intermediate**  
**in the Zinc Mediated Interamolecular Hydroamination**

Sankaranarayana Pillai Sarish, Dirk Schaffner, Yu Sun, and Werner R. Thiel\*

Technische Universität Kaiserslautern, Fachbereich Chemie, Kaiserslautern, Erwin-  
Schrödinger-Str., Geb. 54, 67663 Kaiserslautern, Germany

\*Authors to whom correspondence to be addressed: *thiel@chemie.uni-kl.de*

## NMR spectra

### Compound **1**, $^1\text{H}$ NMR

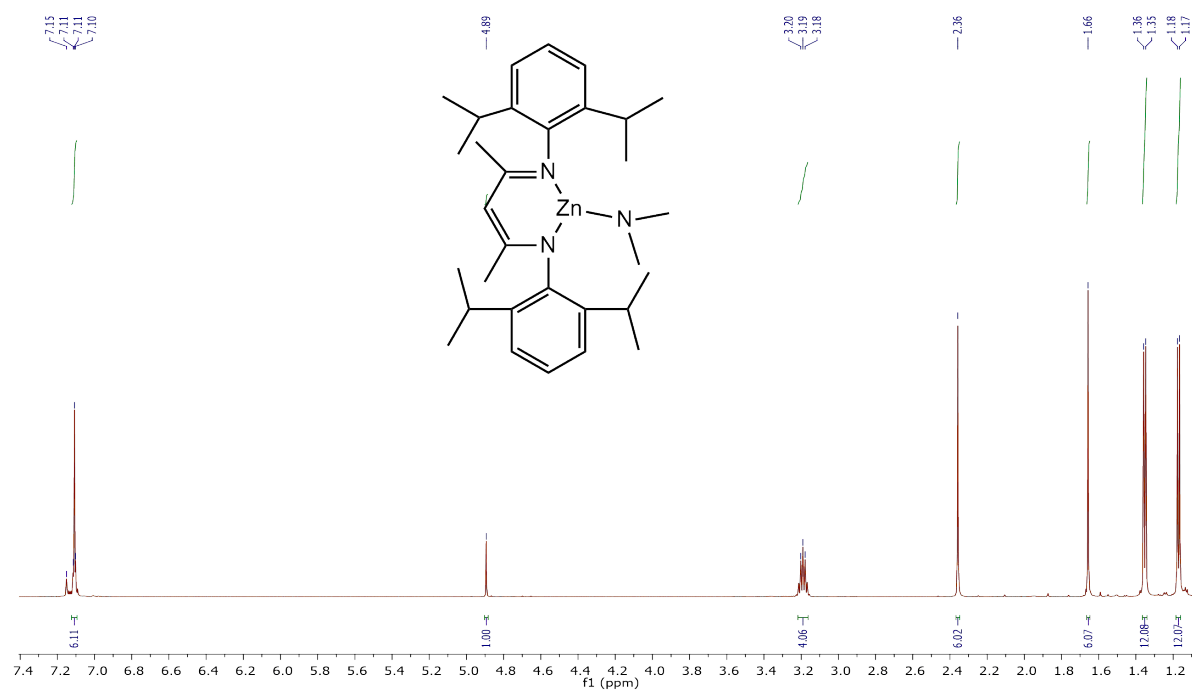

### Compound **1**, $^{13}\text{C}$ NMR

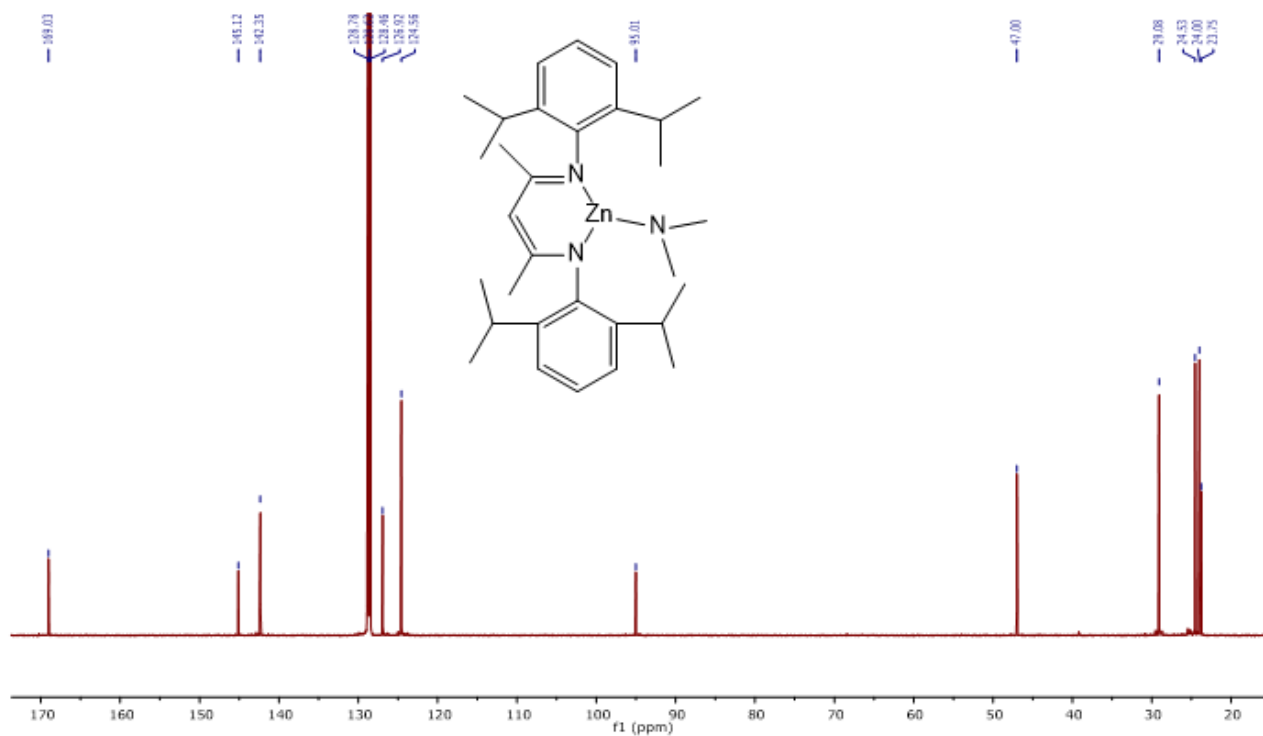

### Compound 2, $^1\text{H}$ NMR

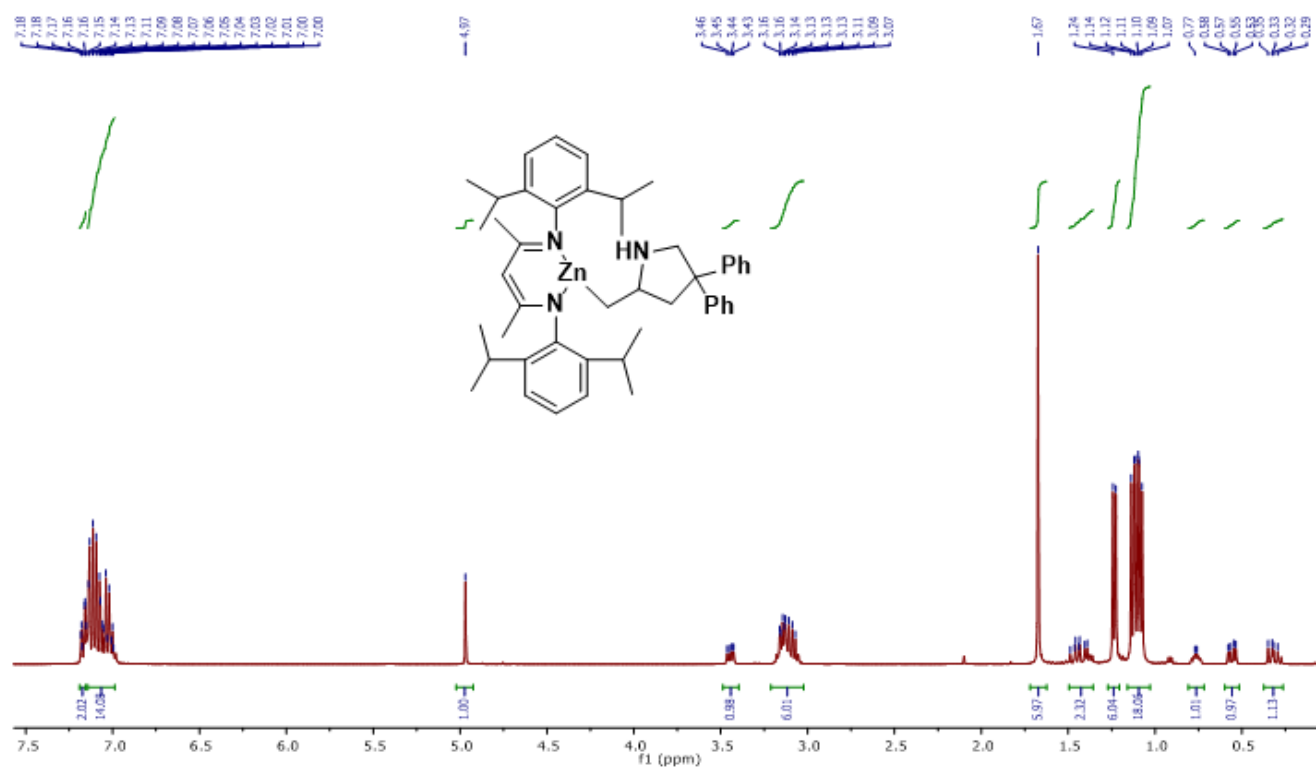

### Compound 2, $^{13}\text{C}$ NMR

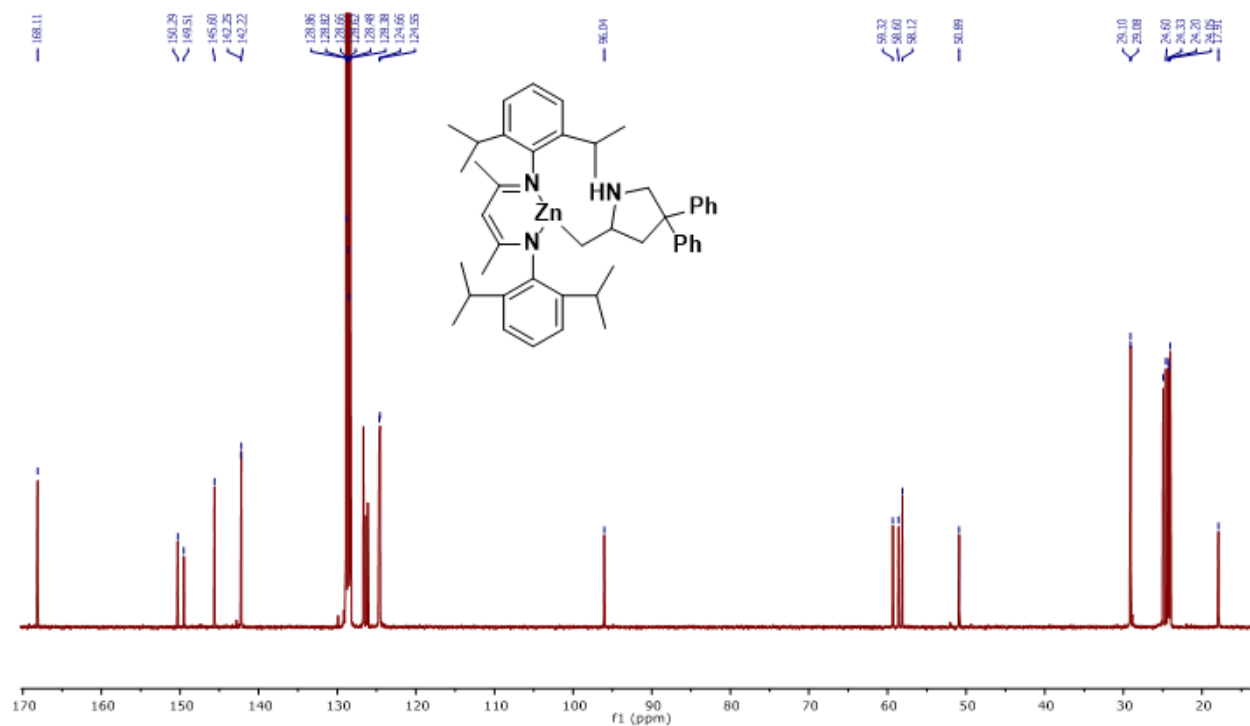

Compound **2**,  $^1\text{H}$ - $^{15}\text{N}$  HSQC

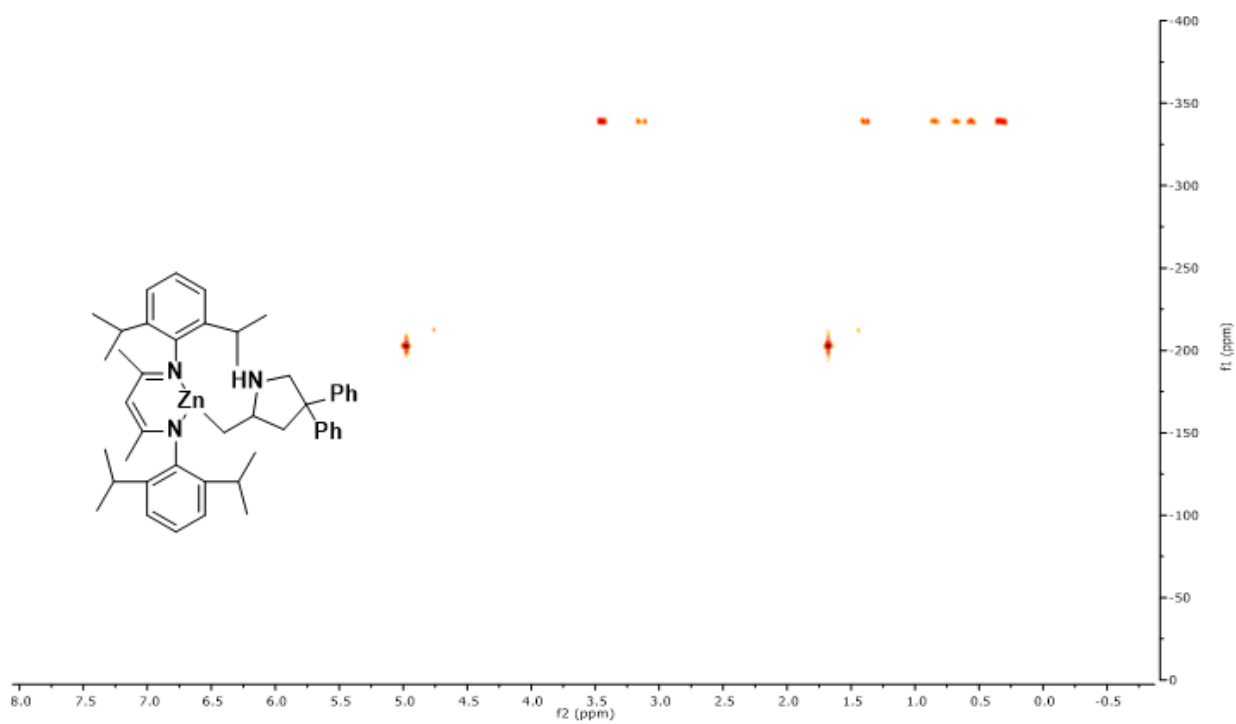

Supplement: c3cc45491f.pdf [file c3cc45491f.pdf]
